# Differential silencing of STAT3 isoforms leads to changes in STAT3 activation

Inbal Shamir<sup>1</sup>, Ilan Tsarfaty<sup>2</sup>, Gidi Paret<sup>1,\*</sup> and Yael Nevo-Caspi<sup>1,\*</sup>

<sup>1</sup>Department of Pediatric Critical Care Medicine, Safra Children's Hospital, Sheba Medical Center, Ramat-Gan, Israel

<sup>2</sup>Department of Clinical Microbiology and Immunology, Sackler School of Medicine, Tel Aviv University, Tel Aviv, Israel

\*These authors contributed equally to this work

**Correspondence to:** Yael Nevo-Caspi, **email:** yael.caspi@sheba.health.gov.il

**Keywords:** STAT3; STAT3 isoforms; breast cancer; cancer diagnosis; cancer therapy

**Abbreviations:** STAT3: Signal transducer and activator of transcription 3; ER: endoplasmic reticulum; TAD: transactivation domain; SH2: Src homology 2; RQ: Relative quantitative

**Received:** November 14, 2022

**Accepted:** April 13, 2023

**Published:** April 24, 2023

**Copyright:** © 2023 Shamir et al. This is an open access article distributed under the terms of the [Creative Commons Attribution License](https://creativecommons.org/licenses/by/3.0/) (CC BY 3.0), which permits unrestricted use, distribution, and reproduction in any medium, provided the original author and source are credited.

## ABSTRACT

**Signal transducer and activator of transcription 3 (STAT3) is a transcription factor involved in multiple fundamental biological processes and a key player in cancer development and progression. STAT3 is activated upon tyrosine phosphorylation and is constitutively active in various malignancies; therefore, the expression of pSTAT3 has been recognized as a predictor of poor survival. STAT3 encodes two alternatively-spliced STAT3 isoforms: the full-length STAT3 $\alpha$  isoform and the truncated STAT3 $\beta$  isoform. These isoforms have been suggested as the reason for the occasionally observed opposing roles of STAT3 in cancer: an oncogene, on one hand, and a tumor suppressor on the other. To investigate their roles in aggressive breast cancer, we separately silenced each isoform and found that they affect each other's activation, impacting cell viability, cytokine expression, and migration. Silencing specific isoforms can lead to a more favorable balance of activated STAT3 proteins in the cell. Distinguishing between the two isoforms and their active forms is crucial for STAT3-related cancer diagnosis and therapy.**

## INTRODUCTION

Signal transducer and activator of transcription 3 (STAT3) is a transcription factor involved in multiple fundamental biological processes such as proliferation, cell survival, differentiation, migration, metabolism, and immune regulation. STAT3 is activated by tyrosine (Y705) phosphorylation, typically in response to extra-cellular ligands such as cytokines and growth factors. Following activation, STAT3 undergoes dimerization and translocation to the nucleus where it regulates transcription of multiple target genes. STAT3 is also phosphorylated on a serine (S727) residue. This phosphorylation contributes to its maximal transcriptional activity and to its localization and function in the mitochondria and endoplasmic reticulum (ER) [1, 2].

STAT3 is expressed in all cell types. Aberrant regulation of STAT3 has been reported in nearly 70% of cancers [3–5]. It is well-known as a major factor in modulating pro-tumorigenic mechanisms by driving inflammation, cell survival, evasion of apoptosis, invasion and metastasis [2, 3, 6, 7]. In various types of malignancies, it has been shown to be constitutively active and therefore, the expression of pSTAT3 has been recognized as a predictor of poor survival [2]. Indeed, STAT3 is considered an oncogene and as such, the enormous therapeutic potential of STAT3 inhibitors is well recognized. Such inhibitors exert their effect either directly, by regulating the expression of STAT3 or by preventing the formation of functional STAT3 dimers through disrupting phosphorylation of STAT3, or by preventing STAT3 binding to DNA, or indirectly by blocking upstream signaling pathways [8, 9]. However,

accumulating evidence from both experimental and clinical studies, suggests that STAT3 may also function as a tumor suppressor. The opposing roles of STAT3 in cancer may be explained by the existence of two alternatively-spliced STAT3 isoforms: the full-length STAT3 $\alpha$  isoform (92 kDa) and the truncated STAT3 $\beta$  isoform (83 kDa) (Figure 1). These transcripts encode almost an identical amino acid sequence however STAT3 $\beta$  lacks the C-terminal transactivation domain (55 amino acids) including the serine (S727) phosphorylation site, which is replaced by a tail of seven unique amino acids [2, 3]. Due to the lack of the transactivation domain, many studies refer to STAT3 $\beta$  as a dominant negative factor of STAT3 $\alpha$ , although lately, it has become evident that STAT3 $\beta$  has its own set of target genes that is distinct from that of STAT3 $\alpha$  [10]. Nevertheless, STAT3 $\alpha$  is considered as an oncogene and STAT3 $\beta$  as a tumor suppressor. Recent studies have demonstrated that in order to execute the suppressive role of STAT3, both STAT3 $\alpha$  and STAT3 $\beta$  are needed [6, 11–13]. The opposing roles of STAT3 may also be attributed to the different STAT3 dimers: since both isoforms can be activated by tyrosine phosphorylation (Y705), the formation of homo- and heterodimers, which represent the functional STAT3 dimer, can readily occur, however their biochemical and biological properties have been shown to differ significantly [2, 3, 5]. Although both isoforms are co-expressed in all cell types, STAT3 $\alpha$  (often referred to as STAT3) is generally expressed at higher levels than STAT3 $\beta$ . Interestingly, the relative amount of these two isoforms can drastically change in response to physiological changes or specific cytokine stimulation, leading to alterations in expression levels and changes in the phosphorylation of the isoforms, resulting in distinct cell responses [2, 3].

In order to fully understand STAT3 function under physiological and pathological conditions, it is crucial to elucidate the specific roles of STAT3 $\alpha$  and

STAT3 $\beta$  together with the mechanisms that regulate their expression, activation and the interplay between them. Such an in-depth understanding will help in the design of specific drugs which may aim to alter the function of one of the STAT3 isoforms and not the other, possibly leading to more accurate diagnosis and efficient therapy.

In this study we examined the roles of STAT3 isoforms using specific siRNAs that target either STAT3 $\alpha$  or STAT3 $\beta$ . We used the MDA-MB-231 cell line which represents an aggressive and mortal subtype of breast cancer, in which STAT3 is overexpressed and constitutively activated [14]. Our results show that each of the isoforms affects the activation (i.e., phosphorylation) of the other isoform and leads to changes in the outcome of the cells. We therefore conclude that both STAT3 $\alpha$  and STAT3 $\beta$  play a crucial role in the function of STAT3 and must be addressed when planning STAT3-based therapies.

## RESULTS

### Silencing STAT3 $\alpha$ or STAT3 $\beta$ affects STAT3 activation

To study the role of the alternatively-spliced STAT3 isoforms (Figure 1) in cancer cells we silenced the mRNA expression of either STAT3 $\alpha$  (si-STAT3 $\alpha$ ), the main isoform, or STAT3 $\beta$  (si-STAT3 $\beta$ ) or both (si-STAT3 $\alpha$ + $\beta$ ) in MDA-MB-231 breast cancer cells using specific siRNA molecules. RNA analysis of the specific isoforms confirmed that the silencing was isoform-specific (Figure 2A). Western blot analysis revealed that transfecting the cells with si-STAT3 $\alpha$  resulted in a 66% decrease in the amount of the STAT3 $\alpha$  protein. However, we were also able to detect a 34% decrease in the amount of the STAT3 $\beta$  protein although STAT3 $\beta$  mRNA levels remained almost unchanged. Following silencing with si-STAT3 $\beta$  there was

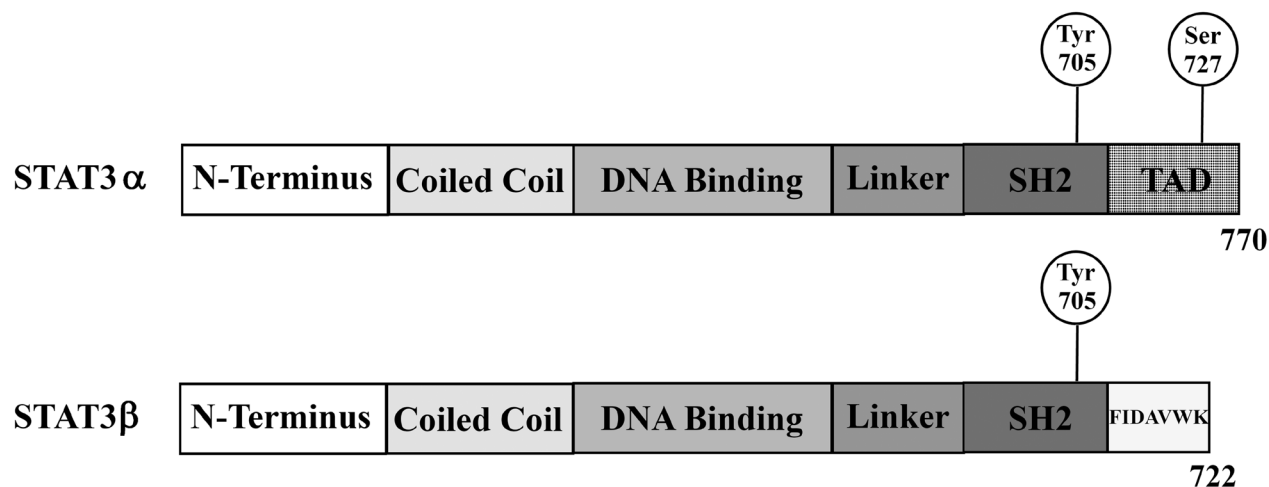

**Figure 1: Schematic overview of the two alternatively spliced STAT3 isoforms STAT3 $\alpha$  and STAT3 $\beta$ .** STAT3 $\beta$  lacks the transactivation domain (TAD) and instead carries seven unique amino acids; Src homology 2 (SH2).

a sharp decrease in the amount of STAT3 $\beta$  (the protein could no longer be detected) while the amount of STAT3 $\alpha$  was not affected. Transfection with si-STAT3 $\alpha+\beta$  resulted in a ~70% decrease in STAT3 $\alpha$  and a sharp decrease in the amount of STAT3 $\beta$  (Figure 2B, 2C). The activation of STAT3 $\alpha$  and STAT3 $\beta$  proteins was studied by determining the level of tyrosine phosphorylation (pY705) on each of the isoforms. Upon silencing of STAT3 $\alpha$ , there was only a 20% reduction in the amount of pSTAT3 $\alpha$  (Y705) molecules. Surprisingly, silencing of STAT3 $\alpha$  caused a 3-fold increase in the amount of pSTAT3 $\beta$  (Y705).

The effect of si-STAT3 $\beta$  on pSTAT3 $\beta$  (Y705) could not be determined due to the very low protein levels upon silencing, however we detected a 40% decrease in the amount of pSTAT3 $\alpha$  (Y705) although STAT3 $\alpha$  protein levels remained unchanged. Si-STAT3 $\alpha+\beta$  caused a 2-fold decrease in pSTAT3 $\alpha$  (Y705) (the level of pSTAT3 $\beta$  (Y705) could not be determined) (Figure 2B, 2D). In addition to pY705, STAT3 $\alpha$  can also be phosphorylated on the serine residue (pS727). This residue does not exist in the STAT3 $\beta$  protein. Western blot revealed that si-STAT3 $\alpha$  caused an 80% decrease in pSTAT3 $\alpha$

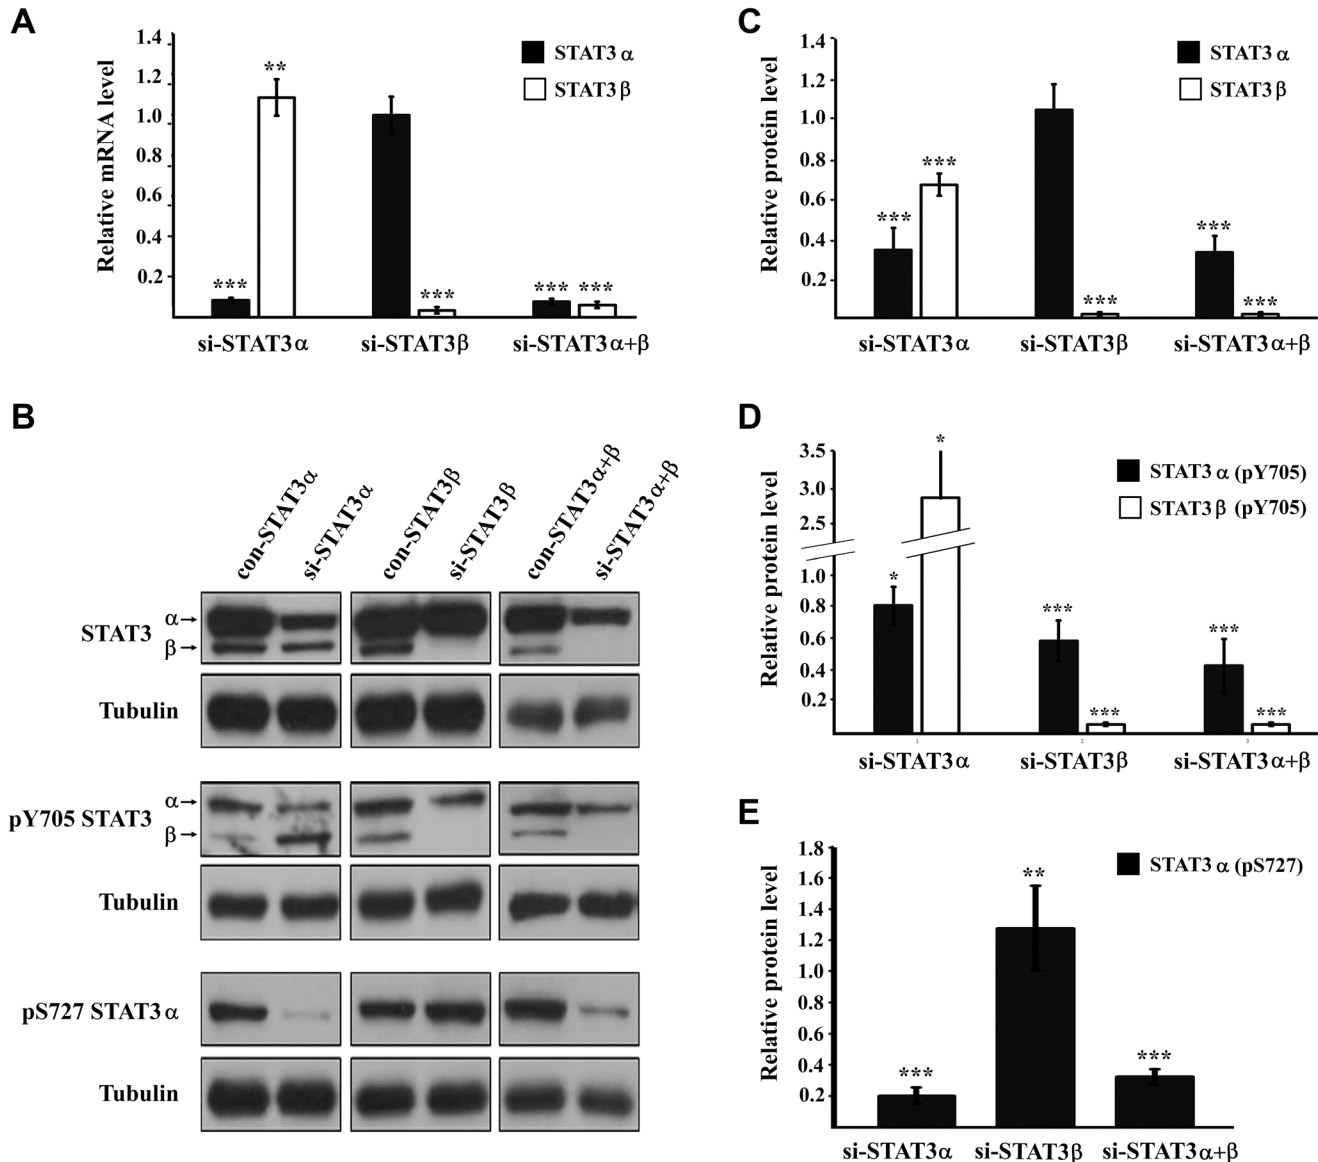

**Figure 2:** STAT3 expression and activation upon mRNA silencing (A) Relative expression of the mRNA of STAT3 isoforms evaluated by RQ-PCR. Results were normalized to those obtained upon transfection with the relevant negative control siRNA that was set to 1. (B) Western blot analysis of cells transfected with the indicated siRNA. Proteins were probed with anti-STAT3, anti-pY705 STAT3, anti-pS727 STAT3 or anti- $\alpha$ Tubulin antibody. (C) Relative protein quantification of STAT3 in (B). (D) Relative protein quantification of pY705 STAT3 in (B). (E) Relative protein quantification of pS727 STAT3 in (B). All protein quantifications were performed with the ImageJ software. The protein amount obtained in the relevant control transfection was set to 1. Results are the mean of at least three repeats of each experiment  $\pm$  SD. \* $P \leq 0.05$ ; \*\* $P \leq 0.01$ ; \*\*\* $P \leq 0.001$ .

(S727) while si-STAT3 $\beta$  caused a 28% increase in the phosphorylation of this residue in STAT3 $\alpha$ . Si-STAT3 $\alpha$ + $\beta$  caused a 70% decrease, in pSTAT3 $\alpha$  (S727) levels (Figure 2B, 2E). Taken together these results imply that there is an interplay between these proteins at both the expression and activation levels. In order to evaluate the relative levels of STAT3 $\alpha$  and STAT3 $\beta$  we calculated the ratio between the two proteins (STAT3 $\alpha$ :STAT3 $\beta$ ). With no treatment, the STAT3 $\alpha$ : STAT3 $\beta$  ratio was 4:1. Silencing STAT3 $\alpha$  reduced the ratio to 2:1 and upon silencing of STAT3 $\beta$  the ratio increased to at least 10:1. Silencing of both isoforms (si-STAT3 $\alpha$ + $\beta$ ) resulted in a 5:1 ratio.

To further validate these results, STAT3 expression was studied in an additional breast cancer cell line. We previously published that silencing of STAT3 isoforms in MCF7 cells, originating from carcinoma breast cancer, resulted in specific silencing of each of the isoforms [15]. In the present study we expanded our analysis to study the activation of the STAT3 proteins in this cell line upon STAT3 silencing. Western blot analysis revealed that S727 phosphorylation in MCF7 cells results in a similar effect as in the MDA-MB-231 cells: silencing STAT3 $\alpha$  resulted in a decrease in pS727 by 67% while silencing STAT3 $\beta$  resulted in a 31% increase (Supplementary Figure 1). Unfortunately, we could not study phosphorylation of Y705 since it occurs at very low levels in MCF7 cells and therefore very hard to detect [16]. Taken together, these results confirm that the phenomenon of one STAT3 isoform affecting the activation of the other STAT3 isoform is not specific to only one cell line, but is a more general one.

### STAT3 $\alpha$ and STAT3 $\beta$ affect differently the gene expression of cytokines

STAT3 plays a key role in the inflammatory response. We examined the mRNA expression of several cytokines upon silencing of the different STAT3 isoforms. We observed that silencing STAT3 $\alpha$  caused an increase in the mRNA levels of CXCL1, CXCL2, CXCL8 and IL1B. However, an opposite outcome was observed upon silencing of STAT3 $\beta$  which caused a decrease in CXCL2, CXCL8 and IL1B expressions (no effect was seen for CXCL1). Furthermore, silencing both isoforms (si-STAT3 $\alpha$ + $\beta$ ) did not affect the expressions of CXCL8 and IL1B but did cause an increase in CXCL1 and a decrease in CXCL2 mRNA levels. IL-6 levels decreased upon all treatments (si-STAT3 $\alpha$ , si-STAT3 $\beta$  and si-STAT3- $\alpha$ + $\beta$ ) (Figure 3A).

### Cell viability is decreased by silencing STAT3 $\alpha$ or STAT3 $\alpha$ + $\beta$ , but is increased by silencing STAT3 $\beta$

Changes in STAT3 activation and in the gene expression of cytokines, which we observed upon silencing of STAT3 isoforms, can affect cell proliferation. In order to examine the distinctive roles of STAT3 $\alpha$  and STAT3 $\beta$  on cell proliferation we performed XTT assays on the treated cells and their controls. Metabolic activity of the cells was followed during five days after transfection (Figure 3B). The si-STAT3 $\alpha$  and si-STAT3 $\alpha$ + $\beta$  treatments caused a reduction in cell viability whereas si-STAT3 $\beta$

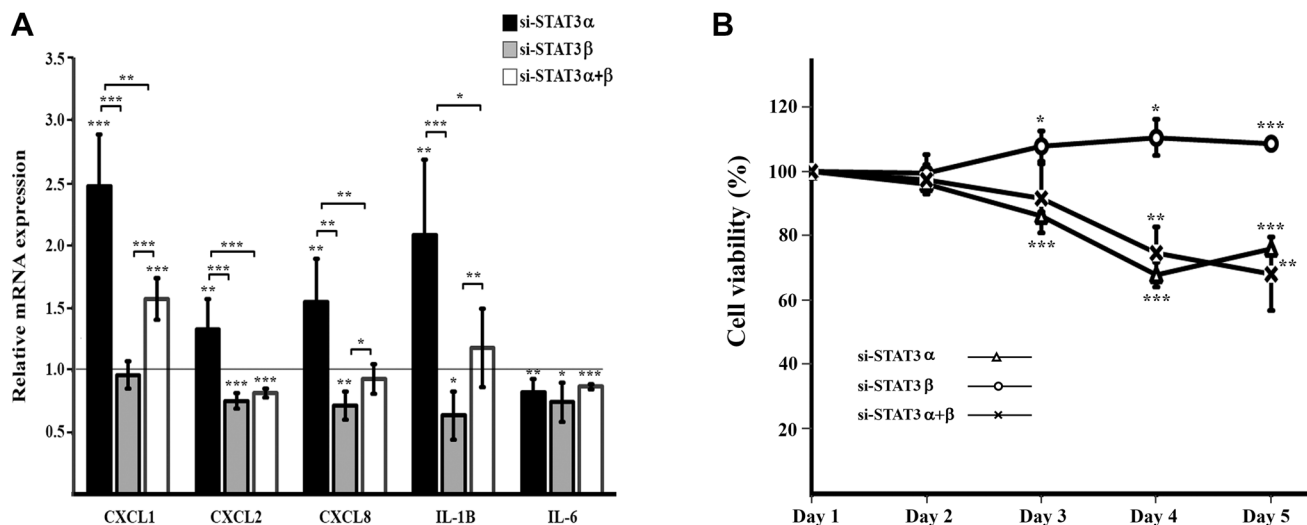

**Figure 3:** Cytokine expression and cell viability upon mRNA silencing of STAT3 isoforms (A) Relative quantification (RQ) of mRNA expression of cytokines upon mRNA silencing of STAT3 isoforms. Results were normalized to those obtained upon transfection with the relevant negative control siRNA that was set to 1. Results are the mean of at least three repeats of each experiment  $\pm$  SD. \* $P \leq 0.05$ ; \*\* $P \leq 0.01$ ; \*\*\* $P \leq 0.001$ . (B) Cell viability upon mRNA silencing of STAT3 isoforms evaluated by XTT assay, was performed over five days following transfection. Each time point was normalized to the measurement on day 1 and cellular growth was compared between treated cells to their respective control cells. Results are the mean of at least three repeats of each experiment  $\pm$  SD. \*\* $P \leq 0.01$ ; Results are the mean of at least three repeats of each experiment  $\pm$  SD. \* $P \leq 0.05$ ; \*\* $P \leq 0.01$ ; \*\*\* $P \leq 0.001$ .



caused an increase in cell viability. These results emphasize, once again, the different roles carried out by the STAT3 $\alpha$  and STAT3 $\beta$  isoforms.

### Different outcomes in cell migration upon silencing of STAT3 isoforms

The MDA-MB-231 cell line represents an aggressive and mortal subtype of breast cancer. Recent studies have shown that STAT3 plays a role in the tumorigenesis of those cells [14]. One of the major hallmarks of tumorigenesis is the ability of the cells to migrate. In order to study the contribution of the STAT3 $\alpha$  and STAT3 $\beta$  isoforms to cell migration, we followed the closing of a scratch wound during 24 hours in MDA-MB-231 cells transfected with either si-STAT3 $\alpha$  or si-STAT3 $\beta$  or both. Silencing of both isoforms (si-STAT3 $\alpha$ + $\beta$ ) slightly decreased cell migration when compared to the control-transfected cells. However silencing of STAT3 $\alpha$  resulted in a significant increase whereas silencing of STAT3 $\beta$  had almost no effect on cell migration (Figure 4A–4F).

## DISCUSSION

The opposing roles of oncogenic STAT3 $\alpha$  and tumor suppressor STAT3 $\beta$  have led researchers to suggest that altering the ratio between them may lead to improved outcomes for the cells and patients. Our study reveals that silencing STAT3 $\alpha$  expression leads to increased activated STAT3 $\beta$  levels, providing a mechanism for favorably shifting the isoform ratio without exogenous DNA insertion. Previous studies involving STAT3 isoforms have relied on exogenous copies of STAT3 $\alpha$  or STAT3 $\beta$ , which may yield artifacts in the results. To more accurately mimic physiological changes, we manipulated endogenous STAT3 isoform expression and measured outcomes. Our findings strongly support the need to consider both isoforms in evaluating and treating patients based on STAT3 expression and activation. Inhibition of one STAT3 isoform, while sparing the other, may improve cancer treatment outcomes.

Our findings indicate that silencing STAT3 $\alpha$  mRNA not only reduces the amount of STAT3 $\alpha$  protein but also leads to a decline in STAT3 $\beta$  protein, despite unaffected STAT3 $\beta$  mRNA levels. However, the decrease in STAT3 $\beta$  is less pronounced compared to STAT3 $\alpha$ , causing a change in the protein ratio from 4:1 to 2:1. These results suggest that STAT3 $\alpha$  may have a role in maintaining STAT3 $\beta$  protein levels.

Phosphorylation of STAT3 on tyrosine 705 (Y705) is considered a marker for STAT3 activation and is well documented across multiple cancer types. It often correlates with a poor prognosis and accelerated disease progression [3]. Therefore, inhibiting pY705 is considered an attractive strategy for anti-cancer therapies. However, we show, that under certain conditions, an increase in

total pSTAT3 (pSTAT3 $\alpha$  and pSTAT3 $\beta$ ) is not necessarily coupled with a bad outcome: in our system, while silencing STAT3 $\alpha$  mRNA caused a decrease in the amount of both STAT3 $\alpha$  and STAT3 $\beta$  proteins, it also led to a 37% increase in total pY705 STAT3 (Figure 5) and reduced cell viability. The increase in the total levels of pY705 STAT3 is attributed mainly to the 3-fold higher levels of pSTAT3 $\beta$  (Y705) and suggests that STAT3 $\alpha$  may play a role in inhibiting the activation of the tumor suppressor, STAT3 $\beta$ . Additionally, silencing STAT3 $\alpha$  mRNA resulted in a 65% decrease in the amount of the STAT3 $\alpha$  protein but only a 20% decrease in pSTAT3 $\alpha$  (Y705) levels. Similar observations were made in other breast cancer cell lines [16] and in esophageal squamous cell carcinoma (ESCC) where STAT3 $\beta$  overexpression protected pSTAT3 $\alpha$  (Y705) from dephosphorylation [12]. As a result of STAT3 $\alpha$  mRNA silencing the ratio of pSTAT3 $\alpha$  to pSTAT3 $\beta$  shifted from 3:1 to 2:3, increasing the likelihood of forming pSTAT3 $\alpha$  (Y705): pSTAT3 $\beta$  (Y705) heterodimers and/or pSTAT3 $\beta$  (Y705) homodimers, which have been shown to be more stable and can lead to improved cell fate and better prognosis [17, 18].

STAT3 can be activated through phosphorylation on the S727 residue, which is exclusive to the STAT3 $\alpha$  isoform. Studies have shown that pSTAT3 $\alpha$  (S727) preferentially localizes in the mitochondria, where it regulates the electron transport chain [19]. Kinases ERK1 and ERK2 contribute to this phosphorylation [6, 20]. Interestingly, recent research has revealed that high levels of STAT3 $\beta$  can hinder ERK1/2's ability to phosphorylate STAT3 $\alpha$  at S727 [21]. Therefore, removing STAT3 $\beta$  may render STAT3 $\alpha$  more susceptible to ERK1/2, resulting in increased levels of pSTAT3 $\alpha$  (S727). Indeed, our study demonstrated an increase in pSTAT3 $\alpha$  (S727) levels upon silencing of STAT3 $\beta$ , which could potentially impact cell function due to the accumulation of active STAT3 $\alpha$  in the mitochondria [1]. Further studies are required to determine the specific effects of phosphorylation at the S727 residue upon STAT3 $\beta$  silencing.

To investigate how changes in STAT3 $\alpha$  and STAT3 $\beta$  levels and activation affect gene transcription patterns, we examined the mRNA levels of several genes involved in immune system recruitment and inflammation. CXCL1, CXCL2, CXCL8 and IL1B exhibited elevated mRNA levels upon silencing of STAT3 $\alpha$  and decreased levels upon silencing of STAT3 $\beta$ . The differential transcription pattern upon silencing of each isoform suggests that STAT3 $\beta$  also plays a role in the expression of these genes. We propose several possible mechanisms, 1. STAT3 $\beta$  being responsible for the transcription of these genes and/ or STAT3 $\alpha$  responsible for their repression 2. pSTAT3 $\beta$  having greater DNA-binding activity than pSTAT3 $\alpha$ , leading to an induction in the transcription of STAT3 $\beta$ -regulated genes [22, 23] 3. As mentioned above, the abundance of pSTAT3 $\beta$  (Y705) results in a greater probability to form stable heterodimers [2, 3, 13, 22, 24, 25]. The intermediate

transcription pattern observed upon silencing of both isoforms suggests that both isoforms play a role in gene transcription. These findings have implications for both autocrine and paracrine activities, affecting cell signaling

and shaping the tumor microenvironment. The outcomes of our study align with previous researches that have proposed an opposing function of STAT3 $\beta$  to STAT3 $\alpha$  [1–3, 13, 26, 27]. However, we cannot compare our

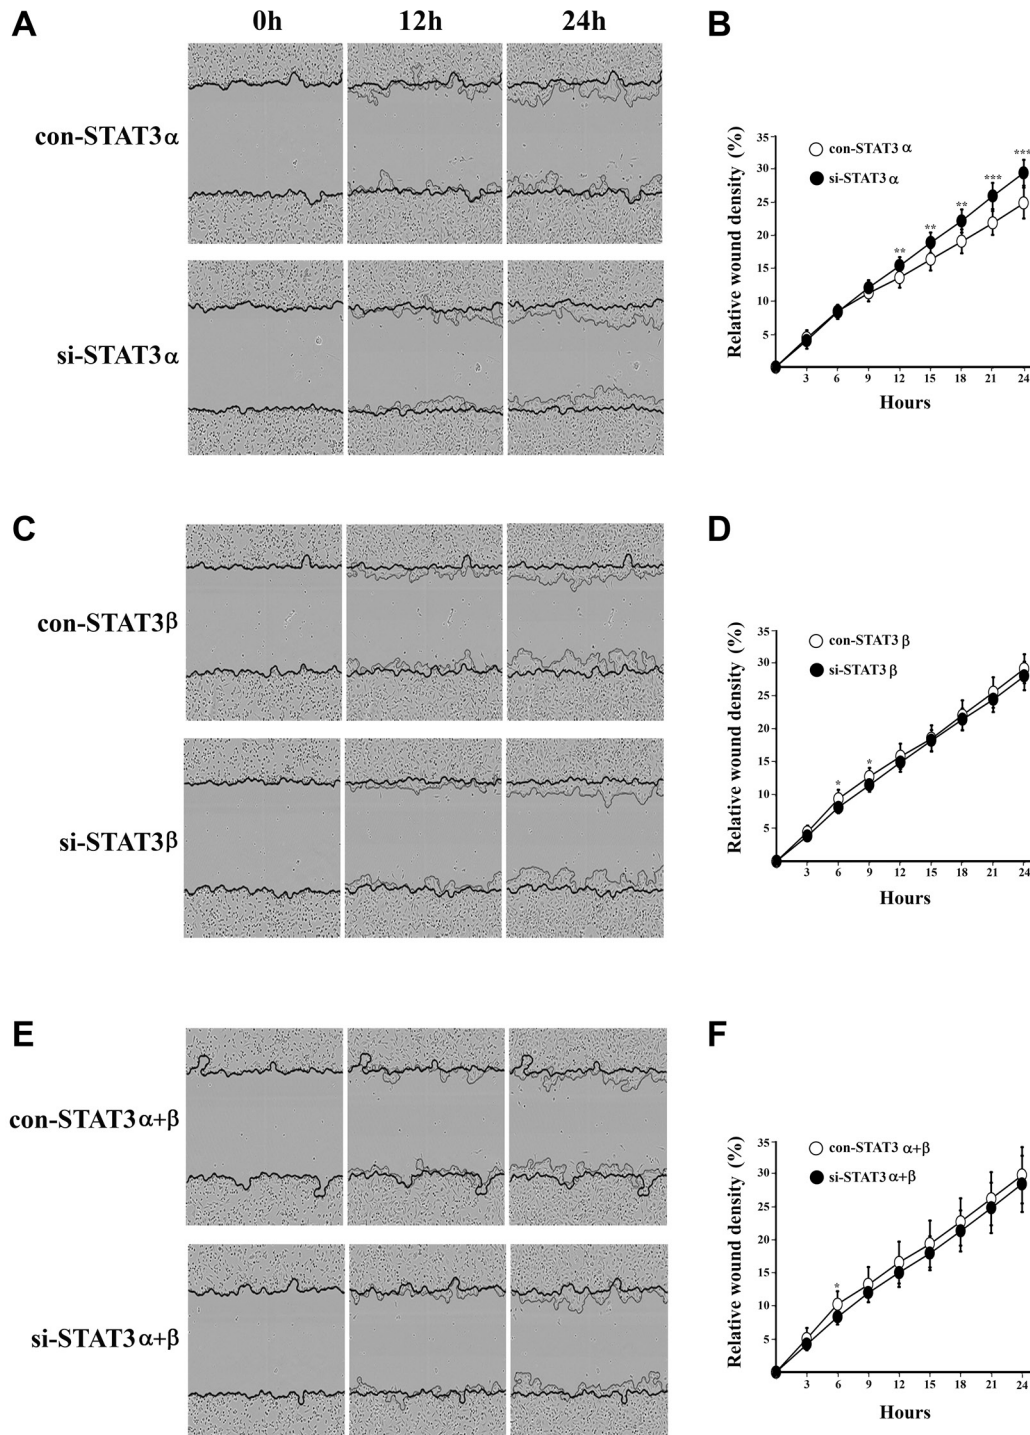

**Figure 4: Cell migration upon mRNA silencing of STAT3 isoforms was measured using the Incucyte scratch wound healing assay.** Images were taken every 45 minutes during 24 hours. Relative Wound Density (RWD) was calculated using the Incucyte Scratch Wound Analysis Software, to quantify migration. On the left panel are representative images of cell migration for each treatment ((A) si- $\alpha$  (C) si- $\beta$  (E) si- $\alpha+\beta$ ) which were taken at time 0 hours (when the scratch was performed), 12 and 24 hours. In the right panel are graphs that represent the RWD for each treatment ((B) si- $\alpha$  (D) si- $\beta$  (F) si- $\alpha+\beta$ ) measured for 24 hours (24–48 hours from transfection). All measurements were performed in triplicates and each experiment was repeated three times  $\pm$  SD. \* $P \leq 0.05$ ; \*\* $P \leq 0.01$ ; \*\*\* $P \leq 0.001$ .

findings from silencing both isoforms using separate siRNAs with the outcomes of studies that used a mutual region-directed siRNA to silence STAT3. Our “double treatment” resulted in a highly effective mRNA silencing of each isoform whereas using a common siRNA that could randomly hybridize with either STAT3 $\alpha$  or STAT3 $\beta$  transcripts, which are present in different ratios in the cell [28] would lead to a different STAT3 $\alpha$ /STAT3 $\beta$  ratio than what we observed in our si-STAT3 $\alpha$ + $\beta$  treatment. As opposed to the differential effects that we observed in the transcript levels of CXCL1, CXCL2, CXCL8 and IL1B upon si-STAT3 $\alpha$  or si-STAT3 $\beta$ , we found IL6 transcription to be reduced upon all our treatments. Several studies reported that STAT3 is part of a positive feedback loop which plays a role in promoting interactions between non-immune and immune cells [29]. Our results show that both STAT3 isoforms play a role in IL6 transcription.

STAT3 plays an important role in promoting cell survival [30, 31]. Our study found that silencing STAT3 $\alpha$  reduces cell viability, while silencing STAT3 $\beta$  increases it, suggesting opposing roles for the two isoforms. While STAT3 is known to contribute to cell viability through its role as a transcription factor in regulating cell cycle genes [2, 6], our results suggest that activation of STAT3 via pY705 is not the only trigger for proliferation (e.g. decreased cell viability when pSTAT3 (Y705) levels are high (silencing of STAT3 $\alpha$ ) or increased cell viability when pSTAT3 (Y705) levels are low (silencing of STAT3 $\beta$ )). CXCL1, CXCL2, CXCL8, and IL1B belong to the TNF signaling pathway and their elevated expression has been shown to be involved in the induction of necroptosis [13, 32]. This indeed can explain the lower cell viability obtained upon silencing

STAT3 $\alpha$  or STAT3 $\alpha$ + $\beta$ . Silencing STAT3 $\beta$ , on the other hand, reduced necroptosis and increased cell viability. It's worth noting that many studies on pSTAT3 (Y705) do not differentiate between the two isoforms, which could lead to misconceptions. We could not determine the exact mechanism underlying changes in cell viability, leaving open the possibility of multiple mechanisms. Recent studies have identified various STAT3 functions that influence cell viability independently of nuclear gene transcription, including those dependent on phosphorylation at serine S727, which has been linked to cell proliferation [1, 6, 33]. Our results indicate that phosphorylation at S727 may play a role in regulating cell viability, as silencing STAT3 $\alpha$  and  $\alpha$ + $\beta$  led to reduced pSTAT3 $\alpha$  (S727), while silencing STAT3 $\beta$  resulted in increased pSTAT3 $\alpha$  (S727). However, additional experiments are needed to fully elucidate the mechanisms responsible for cell viability changes upon altering STAT3 isoform levels. Our findings are consistent with previous research demonstrating that high levels of pSTAT3 $\beta$  (Y705) inhibit cell proliferation and induce cell death [13], and that overexpression of STAT3 $\beta$  in cancer cells results in reduced proliferation, increased apoptosis, and tumor regression [27, 34, 35].

Cancer cells have the ability to invade and form metastases, a process which is associated with epithelial-mesenchymal transition (EMT). Constitutively dimerized forms of STAT3 play a key role in promoting invasion and metastasis [36, 37]. Indeed, we show that when pSTAT3 (Y705) levels are high in the cells (e.g. upon STAT3 $\alpha$  silencing) cell motility is increased while silencing STAT3 $\beta$  or STAT3 $\alpha$ + $\beta$  (resulting in decreased levels of pSTAT3 (Y705)) has no effect. Only the treatment of si-STAT3 $\alpha$  resulted in an increase in the total amount

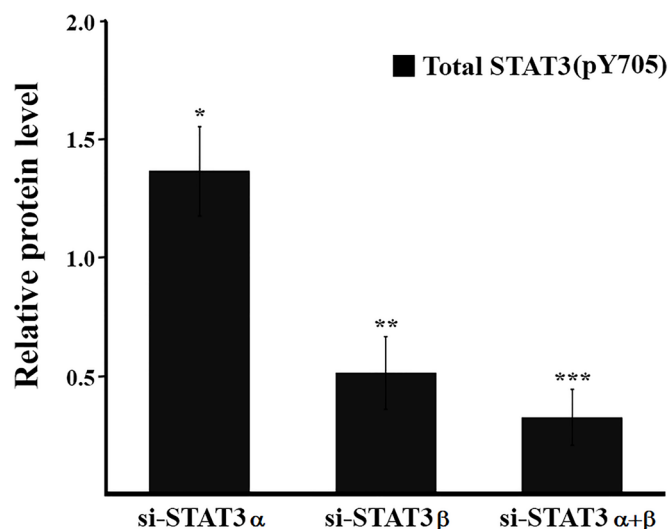

**Figure 5: Estimation of the relative amount of total pSTAT3 (Y705).** Estimation of the relative protein quantification was performed for total pSTAT3 (Y705) (pSTAT3 $\alpha$  (Y705) + pSTAT3 $\beta$  (Y705)) with the ImageJ software from results shown in Figure 2B. The total protein amount in the relevant control was set to 1. Calculations were performed on the results of at least three technical repeats of each biological experiment  $\pm$  SD. \* $P \leq 0.05$ ; \*\* $P \leq 0.01$ ; \*\*\* $P \leq 0.001$ .



of pSTAT3 (Y705) probably leading to an excess of stable heterodimers. Our attempts to look for differential changes in the mRNA expression of genes known to be involved in EMT such as Vimentin, ZEB1, FIN1, Snail1, Snail2 and MMP1, were unsuccessful (Supplementary Figure 2 and Supplementary Table 1). Further experiments are needed to elucidate the exact mechanism involved in changes in cell motility.

Our study emphasizes the importance of distinguishing between STAT3 $\alpha$  and STAT3 $\beta$  proteins and their active forms when discussing STAT3-related cancer diagnosis and therapy. Referring to STAT3 as a single protein can lead to wrong conclusions, as they have different functions. Current STAT3 inhibitors target both isoforms, but this approach should be revised for better patient care. We present an endogenous mechanism that can shift the balance in a favorable direction, and we suggest developing treatments that mimic this mechanism could lead to new avenues for cancer therapy.

## MATERIALS AND METHODS

### Cell culture

MDA-MB-231 (RRID: CVCL\_0062) cells, from a human breast cancer cell line, isolated from a female with adenocarcinoma, were obtained from the American Type Culture Collection (ATCC). The cell line was confirmed to be free of Mycoplasma on a regular basis using PCR Mycoplasma kit (Biological Industries, 20-700-20). Cells were cultured in Dulbecco's modified Eagle's medium (DMEM) (Biological Industries, 01-055-1A) supplemented with 10% fetal bovine serum (FBS) (Biological Industries, 04-007-1A), 1% penicillin: streptomycin (Biological Industries, 03-031-5C) and 1% glutamine (Biological Industries, 03-020-1B), at 37°C in a humidified incubator with 5% CO<sub>2</sub>.

### siRNA of STAT3 $\alpha$ and STAT3 $\beta$

siRNAs are specific for each of the STAT3 isoforms (Ambion, Pleasanton, CA, USA) (5' to 3'):

si-STAT3 $\alpha$ -sense: GCAAUACCAUUGACCUGCCTt;  
si-STAT3 $\alpha$ -antisense: GGCAGGUCAAUGGUUUGCtg;  
si-STAT3 $\beta$ -sense: GUGUGACACCAUUCUUGAtt;  
si-STAT3 $\beta$ -antisense: UCAAUGAAUGGUGUCACACag;  
siRNA negative control (si-CON) (Ambion, Cat. #AM4635).

### Transfection of siRNA

MDA-MB-231 cells were transfected using Lipofectamin 3000<sup>®</sup> (Invitrogen, Carlsbad, CA, USA, L3000-008). Briefly, 2.5 × 10<sup>5</sup> cells were seeded in six-well plates. After 24 hours siRNA was added to the following final concentrations: si-STAT3 $\alpha$  0.02  $\mu$ M;

si-STAT3 $\beta$  0.01  $\mu$ M; si-CON was added to a similar concentration as the relevant si-STAT3. Transfection was continued according to the manufacturer's protocol. The expressions of mRNA and proteins were analyzed 48 hours following transfection. All experiments were repeated at least three times.

### RNA extraction, cDNA preparation and PCR analysis

Total RNA was extracted using TRI Reagent<sup>®</sup> (Sigma/Merck, Darmstadt, Germany, T9424) according to the manufacturer's protocol. cDNA was prepared from 2  $\mu$ g RNA with the High-Capacity cDNA Reverse-Transcription Kit (Applied Biosystems, Vilnius, Lithuania).

Relative quantitative (RQ)-PCR was performed with the TaqMan<sup>®</sup> (AB-4444557) or SYBR Green<sup>®</sup> (Ref: 4385612) Fast Advanced Master Mixes (Applied Biosystems) with 0.5  $\mu$ M of each primer. Probes (5'FAM, 3'BHQ) were used at the following final concentrations: STAT3 $\alpha$  0.25  $\mu$ M; STAT3 $\beta$  0.25  $\mu$ M and ABL 0.125  $\mu$ M.

The primers used in our study (5' to 3'):

STAT3 $\alpha$ -F: TGACACCAACGACCTGCAG  
STAT3 $\alpha$ -R: CAGCACCTTCACCATTATTTCCA  
STAT3 $\alpha$ -probe: CCCCGCACTTTAGATTCATTGATGC  
AGT  
STAT3 $\beta$ -F: GCCCATACTGAAGACCAA  
STAT3 $\beta$ -R: TCAGCACCTTCACCATTATTTCC  
STAT3 $\beta$ -probe: TTTATCTGTGTGACACCATTTCATTG  
ATGCAGTT  
ABL-F: TGGAGATAAACTCTAAGCATAACTAAAGGT  
ABL-R: GATGTAGTTGCTTGGGACCCA  
ABL-probe: CCATTTTTGGTTTTGGGCTTCACACCATT  
CXCL1-F: GCAGCAGTCAGTGAGTCTCTTC  
CXCL1-R: GGGGACTTCACGTTACACT  
CXCL2-F: CAAACCGAAGTCATAGCCAC  
CXCL2-R: GGAACAGCCACCAATAAGCT  
CXCL8-F: GTCTGGACCCCAAGGAAAAC  
CXCL8-R: TTCTTGGATACCACAGAGAATGAA  
IL-1B-F: TCCAGGGACAGGATATGGAG  
IL-1B-R: TCTTTCAACACGCAGGACAG  
IL-6-F: CGGGAACGAAAGAGAAGCTC.  
IL-6-R: AGGCAACACCAGGAGCAG.

All primers were designed to amplify mature mRNA only. The ABL gene was used as a reference gene. All reactions (10  $\mu$ L) were performed in triplicates on the Applied Biosystems StepOne<sup>™</sup> machine using the StepOne v2.3 software. RQ analyses were performed with the  $\Delta\Delta$ CT method. Each experiment was performed at least three times. Results were normalized to those obtained upon transfection with the relevant si-CON which was set to one.



## Cell lysis and western blot analysis

Proteins were extracted using RIPA buffer (Sigma/Merck, Darmstadt, Germany, R0278) supplemented with a protease inhibitor (Roche, Basel, Switzerland, 11836170001) and phosphatase inhibitors (Sigma/Merck, Darmstadt, Germany, P5726, P0044). Following separation on a 7.5% or 10% SDS-PAGE, proteins were transferred to a nitrocellulose membrane followed by staining with a primary antibody overnight at 4°C, washed and incubated with the appropriate secondary antibody for 45 minutes at room temperature. Specific reactive bands were detected with horseradish peroxidase-conjugated secondary antibodies by enhanced chemiluminescence (Cyanagen, 9470XLS0700250). Quantification of proteins was performed with the ImageJ software (National Institute of Health, USA). The antibodies used were as follows: anti-STAT3 1:1000 (Cell Signaling Technology (CST), USA, 124H6) which detects both STAT3 isoforms, anti-pSTAT3 Y705 1:1000 (CST, #9145) which detects both STAT3 isoforms, anti-pSTAT3 S727 (CST, #9134), anti-Tubulin 1:30000 (Abcam).

## Cell proliferation assay (XTT)

Cell viability was measured with a cell proliferation kit (XTT, 20-300-1000, Biological Industries).  $2.5 \times 10^5$  cells were seeded in six-well plates. For the XTT assay, six hours following transfection, live cells (approximately  $8 \times 10^3$  cells) were re-seeded in 96-well plates with DMEM medium in a final volume of 100  $\mu$ l. Plates were incubated at 37°C in a 5% CO<sub>2</sub> incubator. XTT assays were performed according to the manufacturer's protocol. Absorbance was measured at 475 nm against a reference wavelength at 660 nm using a microplate reader (Infinite M200 PRO, Tecan). Cell viability was measured at the following time points: 24 h (day1), 48 h (day2), 72 h (day3), 96 h (day4) and 120 h (day 5) following transfection. Results were expressed as the percentage of XTT, (the absorbance of control cells was set as 100%). All measurements were performed in triplicates and each experiment was repeated at least three times. Each time point was normalized to the measurement on day 1 and cellular growth was compared between treated cell (si-STAT3 $\alpha$ , si-STAT3 $\beta$  or si-STAT3 $\alpha$ + $\beta$ ) and control cells (si-CON- $\alpha$ , si-CON- $\beta$  or si-CON $\alpha$ + $\beta$ ).

## Scratch wound assay

$2.5 \times 10^5$  cells were seeded in six-well plates. Six hours following transfection, live cells were re-seeded in 96-well InCuCyte® ImageLock Plates (Essen BioScience) at a confluency of approximately 75% with DMEM medium in a final volume of 100  $\mu$ l. Plates were incubated overnight at 37°C in a 5% CO<sub>2</sub> incubator.

24 hours following transfection, the wound maker tool ("InCuCyte® wound maker") was used to make scratch wounds and the media was replaced with 100  $\mu$ l of fresh medium. Plates were incubated in the InCuCyte machine (Essen BioScience, USA) and images were taken every 45 minutes during 24 hours. Relative Wound Density was calculated using InCuCyte® Scratch Wound Analysis Software to quantify migration. All measurements were performed in triplicates and each experiment was repeated three times.

## Statistical analysis

*T*-test was used to calculate statistical differences between two samples. Results are given as mean value + SD. A *P*-value of  $\leq 0.05$  was considered statistically significant.

## Author contributions

IS: Conceptualization; Methodology; Data curation; Formal analysis; Investigation; Preparation of figures; Writing – review and editing; IT: Conceptualization, Methodology; GP: Supervision; Funding acquisition; YNC: Conceptualization; Project administration; Methodology; Investigation; Supervision; Validation; Preparation of figures; Writing – original draft, review and editing.

## ACKNOWLEDGMENTS

We thank the Alcalay Center for Pediatric Immunology and Amisragas for their continuous support of the Department of Intensive Care for their support.

## CONFLICTS OF INTEREST

Authors have no conflicts of interest to declare.

## FUNDING

This research received no external funding and was funded with institutional departmental funds. The work was performed at the Department of Pediatric Critical Care Medicine, Safra Children's Hospital, Sheba Medical Center, Tel Hashomer, Israel.

## REFERENCES

1. Avalle L, Poli V. Nucleus, Mitochondrion, or Reticulum? STAT3 à La Carte. *Int J Mol Sci*. 2018; 19:2820. <https://doi.org/10.3390/ijms19092820>. [PubMed]
2. Zhang HF, Lai R. STAT3 in Cancer-Friend or Foe? *Cancers (Basel)*. 2014; 6:1408–40. <https://doi.org/10.3390/cancers6031408>. [PubMed]

3. Aigner P, Just V, Stoiber D. STAT3 isoforms: Alternative fates in cancer? *Cytokine*. 2019; 118:27–34. <https://doi.org/10.1016/j.cyto.2018.07.014>. [PubMed]
4. Belluti S, Rigillo G, Imbriano C. Transcription Factors in Cancer: When Alternative Splicing Determines Opposite Cell Fates. *Cells*. 2020; 9:760. <https://doi.org/10.3390/cells9030760>. [PubMed]
5. Zhang HX, Yang PL, Li EM, Xu LY. STAT3beta, a distinct isoform from STAT3. *Int J Biochem Cell Biol*. 2019; 110:130–39. <https://doi.org/10.1016/j.biocel.2019.02.006>. [PubMed]
6. Marino F, Orecchia V, Regis G, Musteanu M, Tassone B, Jon C, Forni M, Calautti E, Chiarle R, Eferl R, Poli V. STAT3β controls inflammatory responses and early tumor onset in skin and colon experimental cancer models. *Am J Cancer Res*. 2014; 4:484–94. [PubMed]
7. Zou S, Tong Q, Liu B, Huang W, Tian Y, Fu X. Targeting STAT3 in Cancer Immunotherapy. *Mol Cancer*. 2020; 19:145. <https://doi.org/10.1186/s12943-020-01258-7>. [PubMed]
8. Tolomeo M, Cascio A. The Multifaced Role of STAT3 in Cancer and Its Implication for Anticancer Therapy. *Int J Mol Sci*. 2021; 22:603. <https://doi.org/10.3390/ijms22020603>. [PubMed]
9. Yang R, Rincon M. Mitochondrial Stat3, the Need for Design Thinking. *Int J Biol Sci*. 2016; 12:532–44. <https://doi.org/10.7150/ijbs.15153>. [PubMed]
10. Dewilde S, Vercelli A, Chiarle R, Poli V. Of alphas and betas: distinct and overlapping functions of STAT3 isoforms. *Front Biosci*. 2008; 13:6501–14. <https://doi.org/10.2741/3170>. [PubMed]
11. Aigner P, Mizutani T, Horvath J, Eder T, Heber S, Lind K, Just V, Moll HP, Yeroslaviz A, Fischer MJM, Kenner L, Györfy B, Sill H, et al. STAT3β is a tumor suppressor in acute myeloid leukemia. *Blood Adv*. 2019; 3:1989–2002. <https://doi.org/10.1182/bloodadvances.2018026385>. [PubMed]
12. Zhang HF, Chen Y, Wu C, Wu ZY, Twardy DJ, Alshareef A, Liao LD, Xue YJ, Wu JY, Chen B, Xu XE, Gopal K, Gupta N, et al. The Opposing Function of STAT3 as an Oncoprotein and Tumor Suppressor Is Dictated by the Expression Status of STAT3β in Esophageal Squamous Cell Carcinoma. *Clin Cancer Res*. 2016; 22:691–703. <https://doi.org/10.1158/1078-0432.CCR-15-1253>. [PubMed]
13. Zheng ZY, Yang PL, Luo W, Yu SX, Xu HY, Huang Y, Li RY, Chen Y, Xu XE, Liao LD, Wang SH, Huang HC, Li EM, Xu LY. STAT3β Enhances Sensitivity to Concurrent Chemoradiotherapy by Inducing Cellular Necroptosis in Esophageal Squamous Cell Carcinoma. *Cancers (Basel)*. 2021; 13:901. <https://doi.org/10.3390/cancers13040901>. [PubMed]
14. Qin JJ, Yan L, Zhang J, Zhang WD. STAT3 as a potential therapeutic target in triple negative breast cancer: a systematic review. *J Exp Clin Cancer Res*. 2019; 38:195. <https://doi.org/10.1186/s13046-019-1206-z>. [PubMed]
15. Shamir I, Abutbul-Amitai M, Abbas-Egbariya H, Pasmanik-Chor M, Paret G, Nevo-Caspi Y. STAT3 isoforms differentially affect ACE2 expression: A potential target for COVID-19 therapy. *J Cell Mol Med*. 2020; 24:12864–68. <https://doi.org/10.1111/jcmm.15838>. [PubMed]
16. Bharadwaj U, Kasembeli MM, Eckols TK, Kolosov M, Lang P, Christensen K, Edwards DP, Twardy DJ. Monoclonal Antibodies Specific for STAT3β Reveal Its Contribution to Constitutive STAT3 Phosphorylation in Breast Cancer. *Cancers (Basel)*. 2014; 6:2012–34. <https://doi.org/10.3390/cancers6042012>. [PubMed]
17. Dolled-Filhart M, Camp RL, Kowalski DP, Smith BL, Rimm DL. Tissue microarray analysis of signal transducers and activators of transcription 3 (Stat3) and phospho-Stat3 (Tyr705) in node-negative breast cancer shows nuclear localization is associated with a better prognosis. *Clin Cancer Res*. 2003; 9:594–600. [PubMed]
18. Pectasides E, Egloff AM, Sasaki C, Kountourakis P, Burtness B, Fountzilias G, Dafni U, Zaramboukas T, Rampias T, Rimm D, Grandis J, Psyrri A. Nuclear localization of signal transducer and activator of transcription 3 in head and neck squamous cell carcinoma is associated with a better prognosis. *Clin Cancer Res*. 2010; 16:2427–34. <https://doi.org/10.1158/1078-0432.CCR-09-2658>. [PubMed]
19. Peron M, Dinarello A, Meneghetti G, Martorano L, Betto RM, Facchinello N, Tesoriere A, Tiso N, Martello G, Argenton F. Y705 and S727 are required for the mitochondrial import and transcriptional activities of STAT3, and for regulation of stem cell proliferation. *Development*. 2021; 148:dev199477. <https://doi.org/10.1242/dev.199477>. [PubMed]
20. Decker T, Kovarik P. Serine phosphorylation of STATs. *Oncogene*. 2000; 19:2628–37. <https://doi.org/10.1038/sj.onc.1203481>. [PubMed]
21. Zheng ZY, Yang PL, Li RY, Liu LX, Xu XE, Liao LD, Li X, Chu MY, Peng L, Huang QF, Heng JH, Wang SH, Wu ZY, et al. STAT3β disrupted mitochondrial electron transport chain enhances chemosensitivity by inducing pyroptosis in esophageal squamous cell carcinoma. *Cancer Lett*. 2021; 522:171–83. <https://doi.org/10.1016/j.canlet.2021.09.035>. [PubMed]
22. Schaefer TS, Sanders LK, Park OK, Nathans D. Functional differences between Stat3alpha and Stat3beta. *Mol Cell Biol*. 1997; 17:5307–16. <https://doi.org/10.1128/MCB.17.9.5307>. [PubMed]
23. Park OK, Schaefer LK, Wang W, Schaefer TS. Dimer stability as a determinant of differential DNA binding activity of Stat3 isoforms. *J Biol Chem*. 2000; 275:32244–49. <https://doi.org/10.1074/jbc.M005082200>. [PubMed]
24. Huang Y, Qiu J, Dong S, Redell MS, Poli V, Mancini MA, Twardy DJ. Stat3 isoforms, alpha and beta, demonstrate distinct intracellular dynamics with prolonged nuclear retention of Stat3beta mapping to its unique C-terminal end. *J Biol Chem*. 2007; 282:34958–67. <https://doi.org/10.1074/jbc.M704548200>. [PubMed]

25. Ng IH, Ng DC, Jans DA, Bogoyevitch MA. Selective STAT3- $\alpha$  or - $\beta$  expression reveals spliceform-specific phosphorylation kinetics, nuclear retention and distinct gene expression outcomes. *Biochem J.* 2012; 447:125–36. <https://doi.org/10.1042/BJ20120941>. [PubMed]
26. Shao Y, Bajikar SS, Tirumala HP, Gutierrez MC, Wythe JD, Zoghbi HY. Identification and characterization of conserved noncoding cis-regulatory elements that impact Mesp2 expression and neurological functions. *Genes Dev.* 2021; 35:489–94. <https://doi.org/10.1101/gad.345397.120>. [PubMed]
27. Zammarchi F, de Stanchina E, Bournazou E, Supakorndej T, Martires K, Riedel E, Corben AD, Bromberg JF, Cartegni L. Antitumorigenic potential of STAT3 alternative splicing modulation. *Proc Natl Acad Sci U S A.* 2011; 108:17779–84. <https://doi.org/10.1073/pnas.1108482108>. [PubMed]
28. Chakraborty A, White SM, Schaefer TS, Ball ED, Dyer KF, Tweardy DJ. Granulocyte colony-stimulating factor activation of Stat3 alpha and Stat3 beta in immature normal and leukemic human myeloid cells. *Blood.* 1996; 88:2442–49. [PubMed]
29. Hirano T. IL-6 in inflammation, autoimmunity and cancer. *Int Immunol.* 2021; 33:127–48. <https://doi.org/10.1093/intimm/dxaa078>. [PubMed]
30. Shastri A, Choudhary G, Teixeira M, Gordon-Mitchell S, Ramachandra N, Bernard L, Bhattacharyya S, Lopez R, Pradhan K, Giricz O, Ravipati G, Wong LF, Cole S, et al. Antisense STAT3 inhibitor decreases viability of myelodysplastic and leukemic stem cells. *J Clin Invest.* 2018; 128:5479–88. <https://doi.org/10.1172/JCI120156>. [PubMed]
31. Xu Y, Feng S, Niu B. Silencing Stat3 inhibits viability and induces apoptosis in BGC-823 human gastric cancer cell line. *Biotech Histochem.* 2021; 96:76–81. <https://doi.org/10.1080/10520295.2020.1770332>. [PubMed]
32. Zhu K, Liang W, Ma Z, Xu D, Cao S, Lu X, Liu N, Shan B, Qian L, Yuan J. Necroptosis promotes cell-autonomous activation of proinflammatory cytokine gene expression. *Cell Death Dis.* 2018; 9:500. <https://doi.org/10.1038/s41419-018-0524-y>. [PubMed]
33. Zhang Q, Raje V, Yakovlev VA, Yacoub A, Szczepanek K, Meier J, Derecka M, Chen Q, Hu Y, Sisler J, Hamed H, Lesnefsky EJ, Valerie K, et al. Mitochondrial localized Stat3 promotes breast cancer growth via phosphorylation of serine 727. *J Biol Chem.* 2013; 288:31280–88. <https://doi.org/10.1074/jbc.M113.505057>. [PubMed]
34. Tano V, Jans DA, Bogoyevitch MA. Oligonucleotide-directed STAT3 alternative splicing switch drives antitumorigenic outcomes in MCF10 human breast cancer cells. *Biochem Biophys Res Commun.* 2019; 513:1076–82. <https://doi.org/10.1016/j.bbrc.2019.04.054>. [PubMed]
35. Xu G, Zhang C, Zhang J. Dominant negative STAT3 suppresses the growth and invasion capability of human lung cancer cells. *Mol Med Rep.* 2009; 2:819–24. <https://doi.org/10.3892/mmr.00000178>. [PubMed]
36. Suiqing C, Min Z, Lirong C. Overexpression of phosphorylated-STAT3 correlated with the invasion and metastasis of cutaneous squamous cell carcinoma. *J Dermatol.* 2005; 32:354–60. <https://doi.org/10.1111/j.1346-8138.2005.tb00906.x>. [PubMed]
37. Wei D, Le X, Zheng L, Wang L, Frey JA, Gao AC, Peng Z, Huang S, Xiong HQ, Abbruzzese JL, Xie K. Stat3 activation regulates the expression of vascular endothelial growth factor and human pancreatic cancer angiogenesis and metastasis. *Oncogene.* 2003; 22:319–29. <https://doi.org/10.1038/sj.onc.1206122>. [PubMed]
